# Supplementary material for: Acquisition of EMT phenotype in the gefitinib-resistant cells of a head and neck squamous cell carcinoma cell line through Akt/GSK-3β/snail signalling pathway
Source: PubMed Central journal article supplement (PMC3304404; doi:10.1038/bjc.2012.24), 2012-02-07
Supplement: bjc201224x1.pdf [file bjc201224x1.pdf]

# Supplementary Figure 1S

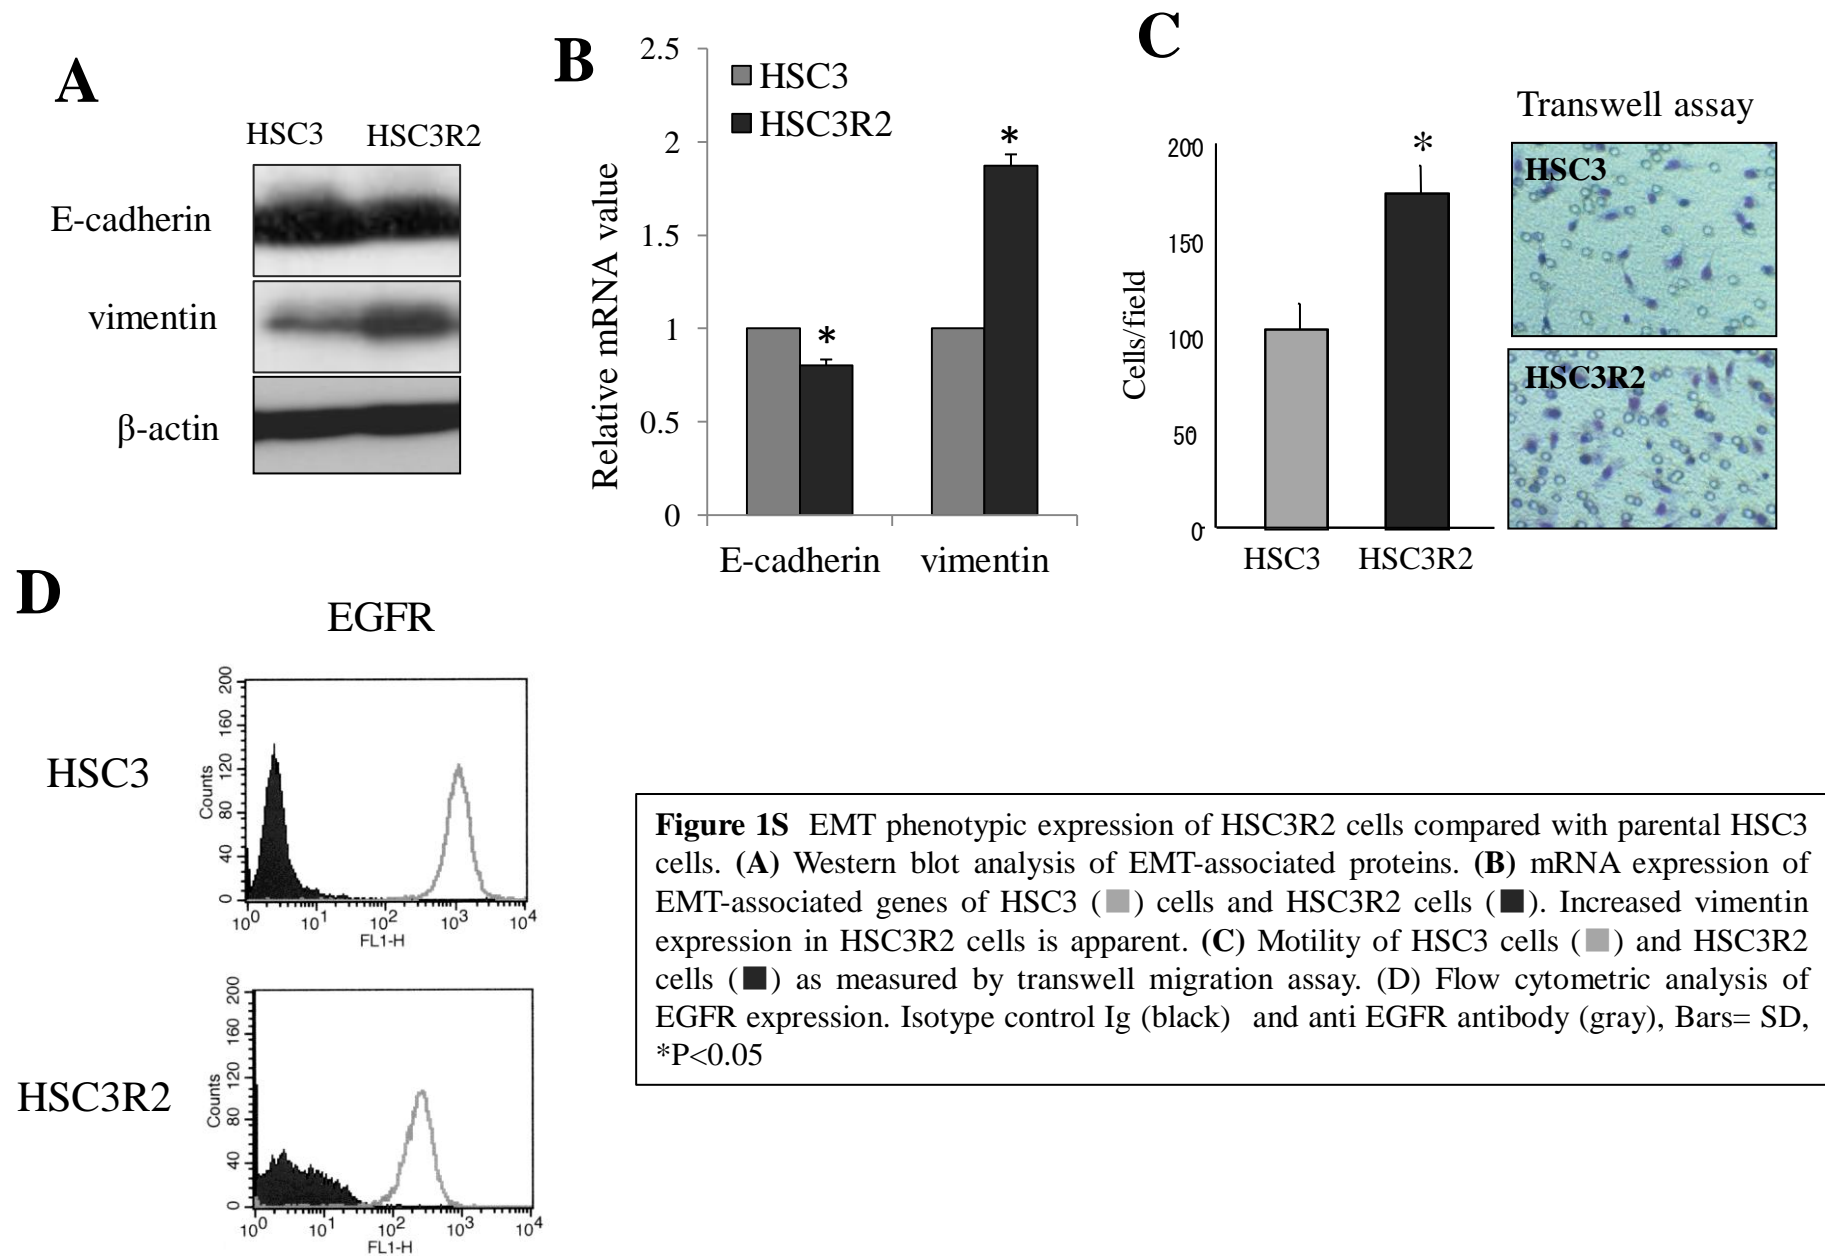

**Figure 1S** EMT phenotypic expression of HSC3R2 cells compared with parental HSC3 cells. (A) Western blot analysis of EMT-associated proteins. (B) mRNA expression of EMT-associated genes of HSC3 (■) cells and HSC3R2 cells (■). Increased vimentin expression in HSC3R2 cells is apparent. (C) Motility of HSC3 cells (■) and HSC3R2 cells (■) as measured by transwell migration assay. (D) Flow cytometric analysis of EGFR expression. Isotype control Ig (black) and anti EGFR antibody (gray), Bars= SD, \*P<0.05

# Supplementary Figure 2S

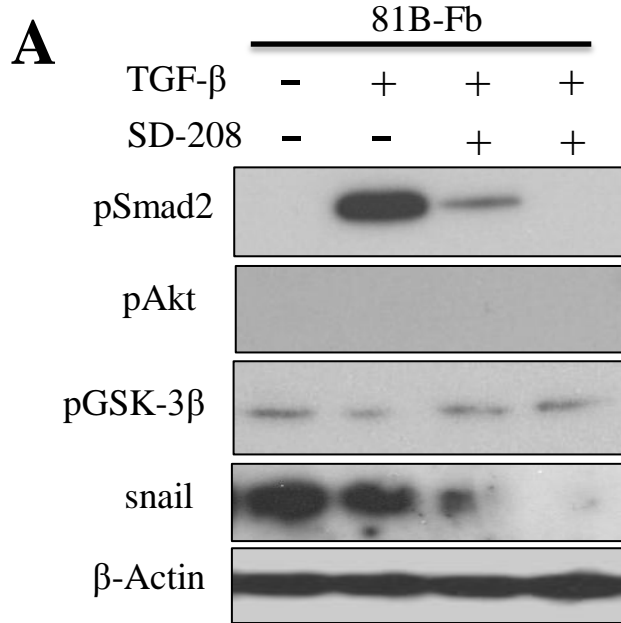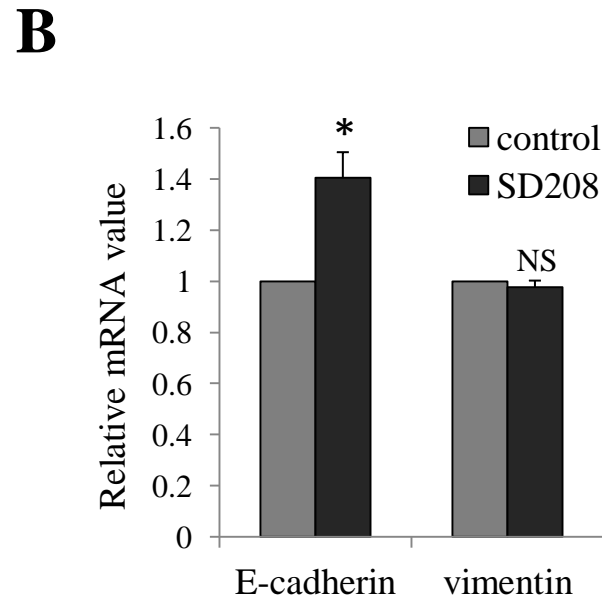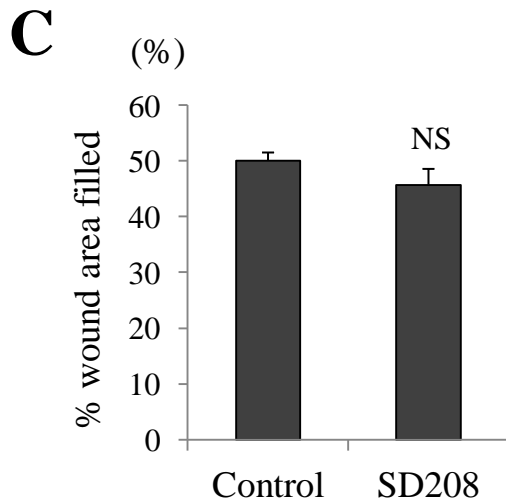

**Figure 2S** Effects of TGF- $\beta$  and TGF- $\beta$ RI inhibitor (SD208) on the EMT phenotype of 81B-Fb cells. (A) Western blot analysis. Cells were starved in serum-free medium for 24 h, and exposed to SD208 at increasing concentrations (1 and 5  $\mu$ M) for 2 h at 37°C. Cells were then stimulated with TGF- $\beta$  (2.5 ng/ml) for 10 min, lysed and subjected to Western blotting. (B) mRNA expression of E-cadherin and vimentin of 81B-Fb cells with or without SD208. (C) Motility of 81B-Fb cells as measured by wound-closure assay. Bars= SD, \*P<0.05. NS=not significant.

# Supplementary Figure 3S

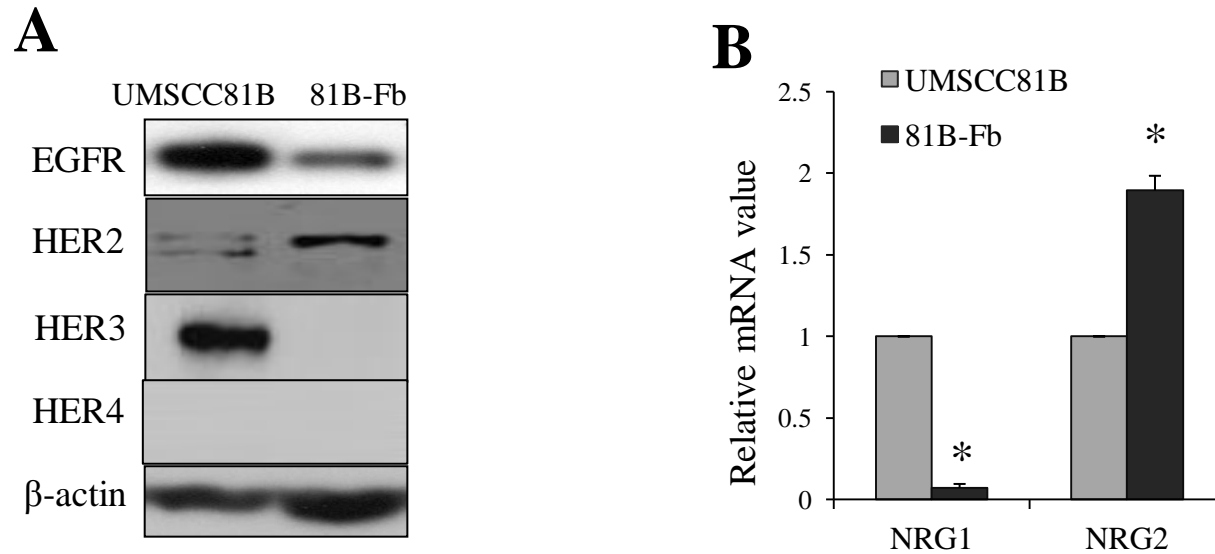

**Figure 3S** Expression of HER receptor family and neuregulin ligands in UMSCC81B and 81B-Fb cells. **(A)** Western blot analysis of EGFR, HER2, HER3 and HER4 in UMSCC81B and 81B-Fb cells. **(B)** qRT-PCR analysis of NRG1 and NRG2 mRNA expression in UMSCC81B cells (■) and 81B-Fb cells (■). Bars=SD, \*P<0.05.

# Supplementary Figure 4S

## A

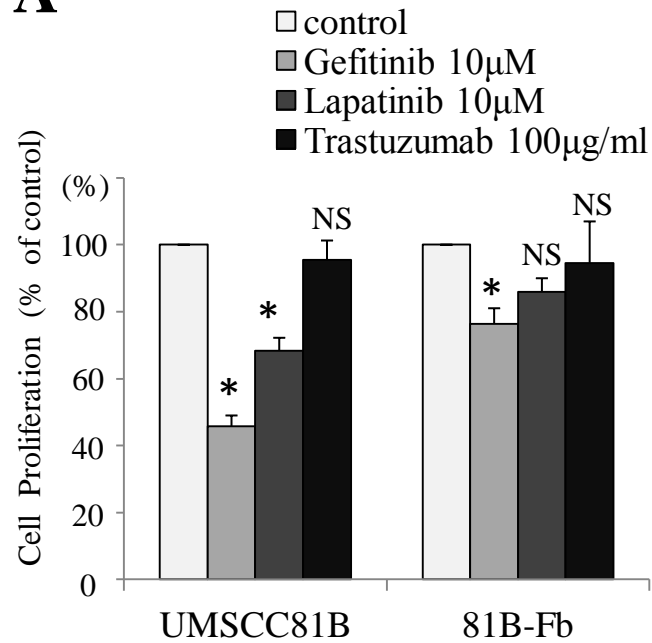

## B

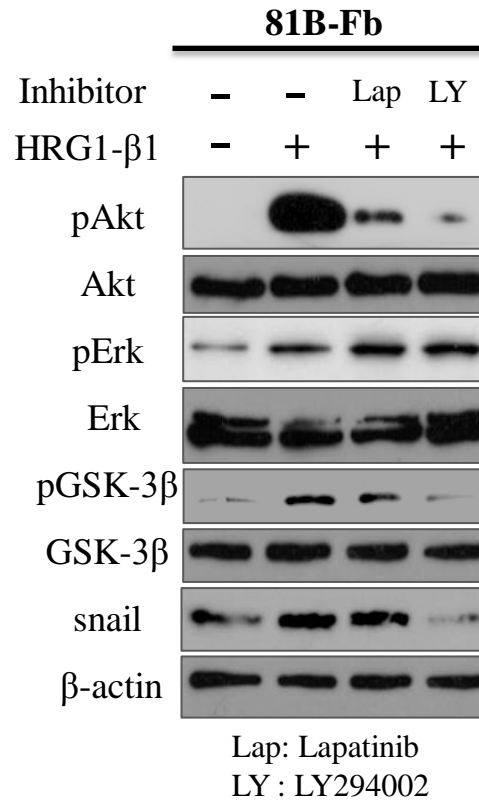

## C

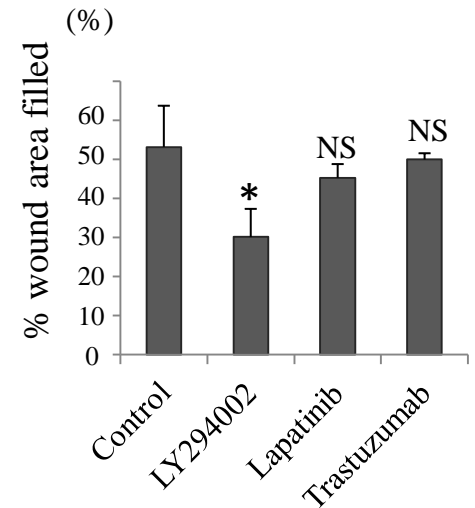

## D

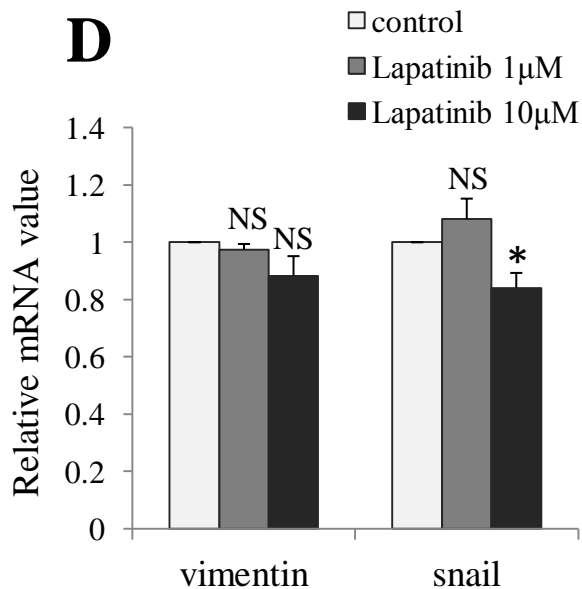

**Figure 4S** Effects of lapatinib and trastuzumab on the proliferation and EMT phenotype of 81B-Fb cells. (A) Growth inhibition of 81B-Fb cells by gefitinib, lapatinib and trastuzumab. (B) Western blot analysis of Akt, GSK-3 $\beta$  and snail expression in response to heregulin- $\beta$ 1 with or without lapatinib (LY294002) treatment. (C) Inhibition of motility of 81B-Fb cells by LY294002, lapatinib and trastuzumab treatment (12 h). (D) Effect of lapatinib treatment (24 h) on the vimentin and snail mRNA expression of 81B-Fb cells. Bars= SD, \*P<0.05. NS=not significant.

# Supplementary Table 1S

## Sequences of primer-pairs for qRT-PCR used in this study

|              | Forward                    | Reverse                | probe number |
|--------------|----------------------------|------------------------|--------------|
| E-cadherin   | cctggcctcagaagacagaa       | ttgtctttgttgatttgatctg | # 44         |
| vimentin     | aaagtgtggctgccaagaac       | agcctcagagaggtcagcaa   | # 16         |
| snail        | gctgcaggactctaataccaga     | atctccggaggtgggatg     | # 11         |
| twist        | aaggcatcactatggactttctct   | gccagtttgatcccagtatctt | # 6          |
| slug         | ttatgttctctataaaacactgactg | tgcagtgagggcaagaaaa    | # 7          |
| EGF          | aagaatgggggtcaaccagt       | tgaagttggttgattgacc    | # 27         |
| HB-EGF       | tggggcttctcatgttagg        | catgcccaacttcactttctc  | # 55         |
| amphiregulin | cggagaatgcaaataatagagcac   | caccgaaatattcttgctgaca | # 38         |
| EGFR         | cgggacatagtcagcagtga       | gggacagcttgatcacact    | # 44         |
| NRG1         | cttgtggctggcatcatgt        | cagcttttccgctgtttct    | # 49         |
| NRG2         | caaatatggcaacggcaga        | ggcctcgcagacatactcc    | # 39         |
| GAPDH        | agccacatcgctcagacac        | gcccaatacgaccaaatcc    | # 60         |
